# Supplementary material
Source: publisher figshare collection journal article supplement (https://acs.figshare.com/ndownloader/files/4990096)
Supplement: Supplementary file 1 [file 4990096]

## **Supporting Information**

### **Potential Metabolic Activation of a Representative C2-Alkylated Polycyclic Aromatic Hydrocarbon 6-Ethylchrysene Associated With the Deepwater Horizon Oil Spill in Human Hepatoma (HepG2) Cells**

Meng Huang,<sup>†</sup> Clementina Mesaros,<sup>‡</sup> Suhong Zhang,<sup>‡</sup> Ian A. Blair,<sup>†,‡</sup> and Trevor M. Penning<sup>\*,†,‡</sup>

<sup>†</sup> Center of Excellence in Environmental Toxicology and <sup>‡</sup> Center for Cancer Pharmacology, Department of Systems Pharmacology and Translational Therapeutics, Perelman School of Medicine, University of Pennsylvania, Philadelphia, Pennsylvania 19104-6160, United States

## Table of Contents

**Figure S1.** Excitation wavelength and emission wavelength spectra of 6-EC.

**Figure S2.** UV spectra of 6-EC and metabolites 1-9 in HepG2 cells.

**Figure S3.** Detection of 6-EC-dihydrodiols and monodehydrated 6-EC-dihydrodiols in human HepG2 cells. (A) Extracted ion chromatogram of Orbitrap full scan for 6-EC-dihydrodiols at 0 h. (B) Extracted ion chromatogram of Orbitrap full scan for 6-EC-dihydrodiols at 24 h and MS spectrum of the peak at 18.91 min. (C) Extracted ion chromatogram of Orbitrap full scan for monodehydrated 6-EC-dihydrodiols at 0 h. (D) Extracted ion chromatogram of Orbitrap full scan for monodehydrated 6-EC-dihydrodiols at 24 h and MS spectrum of the peak at 18.43 min.

**Figure S4.** Detection of monodehydrated 6-EC-tetraol and bis-dehydrated 6-EC-tetraol in human HepG2 cells. (A) Extracted ion chromatogram of Orbitrap full scan for monodehydrated 6-EC-tetraol at 0 h. (B) Extracted ion chromatogram of Orbitrap full scan for monodehydrated 6-EC-tetraol at 24 h and MS spectrum of the peak at 14.78 min. (C) Extracted ion chromatogram of Orbitrap full scan for bis-dehydrated 6-EC-tetraol at 0 h. (D) Extracted ion chromatogram of Orbitrap full scan for bis-dehydrated 6-EC-tetraol at 24 h and MS spectrum of the peak at 13.60 min.

**Figure S5.** Detection of bis-tetraol in human HepG2 cells. (A) Extracted ion chromatogram of Orbitrap full scan at 0 h. (B) Extracted ion chromatogram of Orbitrap full scan at 24 h and MS spectrum of the peak at 14.66 min.

**Figure S6.** Detection of O-monomethyl-catechol-6-EC-ortho-quinone in human HepG2 cells. (A) Extracted ion chromatogram of Orbitrap full scan at 0 h. (B) Extracted ion chromatogram of Orbitrap full scan at 24 h and MS spectrum of the peak at 19.68 min.

**Figure S7.** Detection of 6-EC-bis-ortho-quinone in human HepG2 cells. (A) Extracted ion chromatogram of Orbitrap full scan at 0 h. (B) Extracted ion chromatogram of Orbitrap full scan at 24 h and MS spectrum of the peak at 17.08 min.

This material is available free of charge via the Internet at <http://pubs.acs.org>.

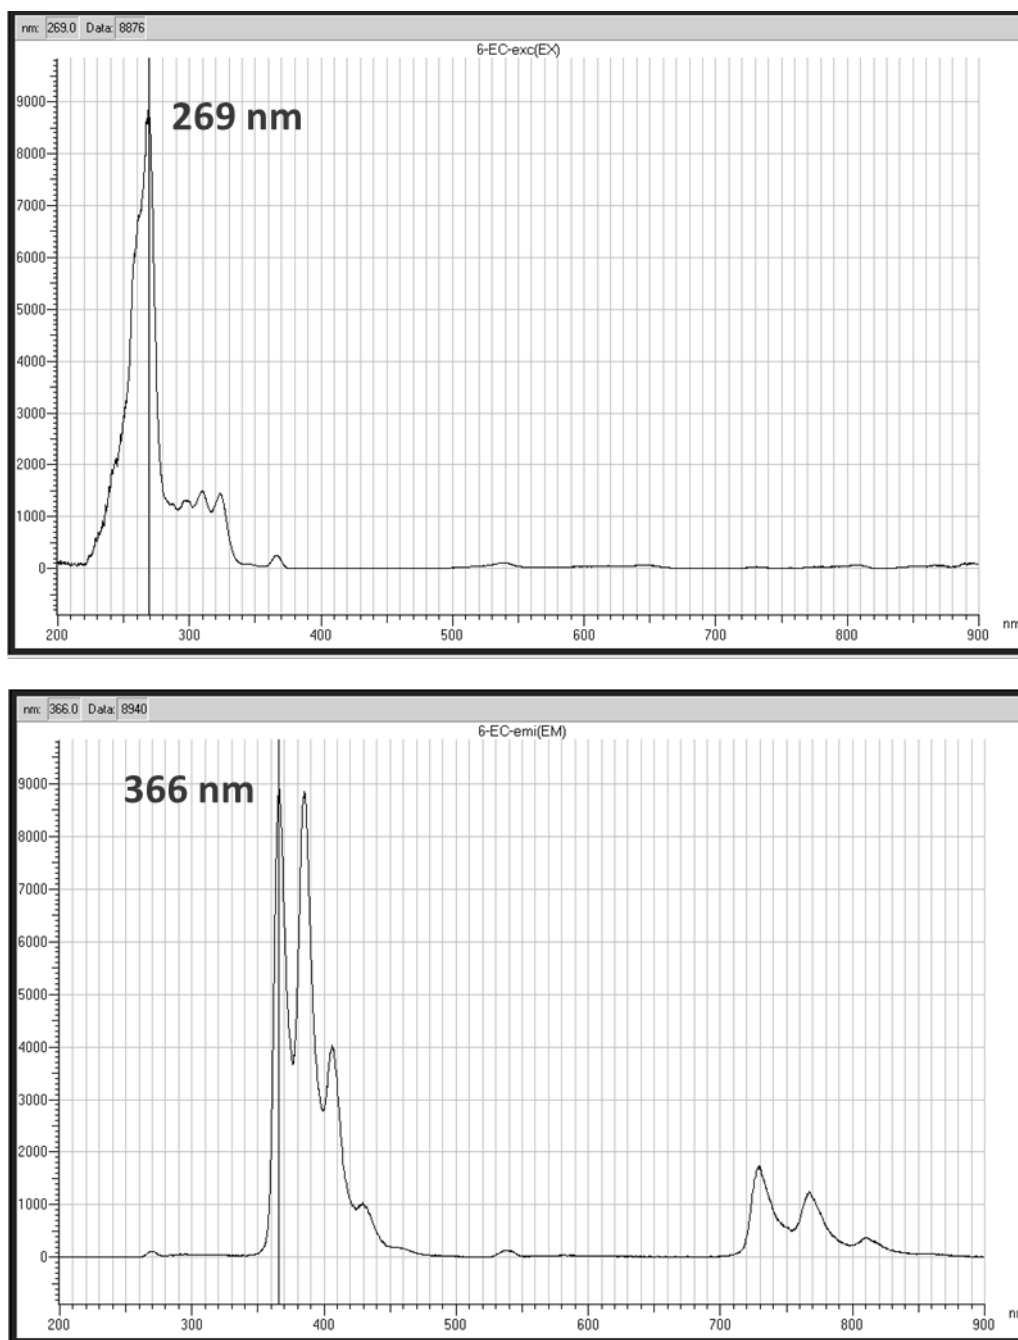

**Figure S1.** Excitation wavelength and emission wavelength spectra of 6-EC.

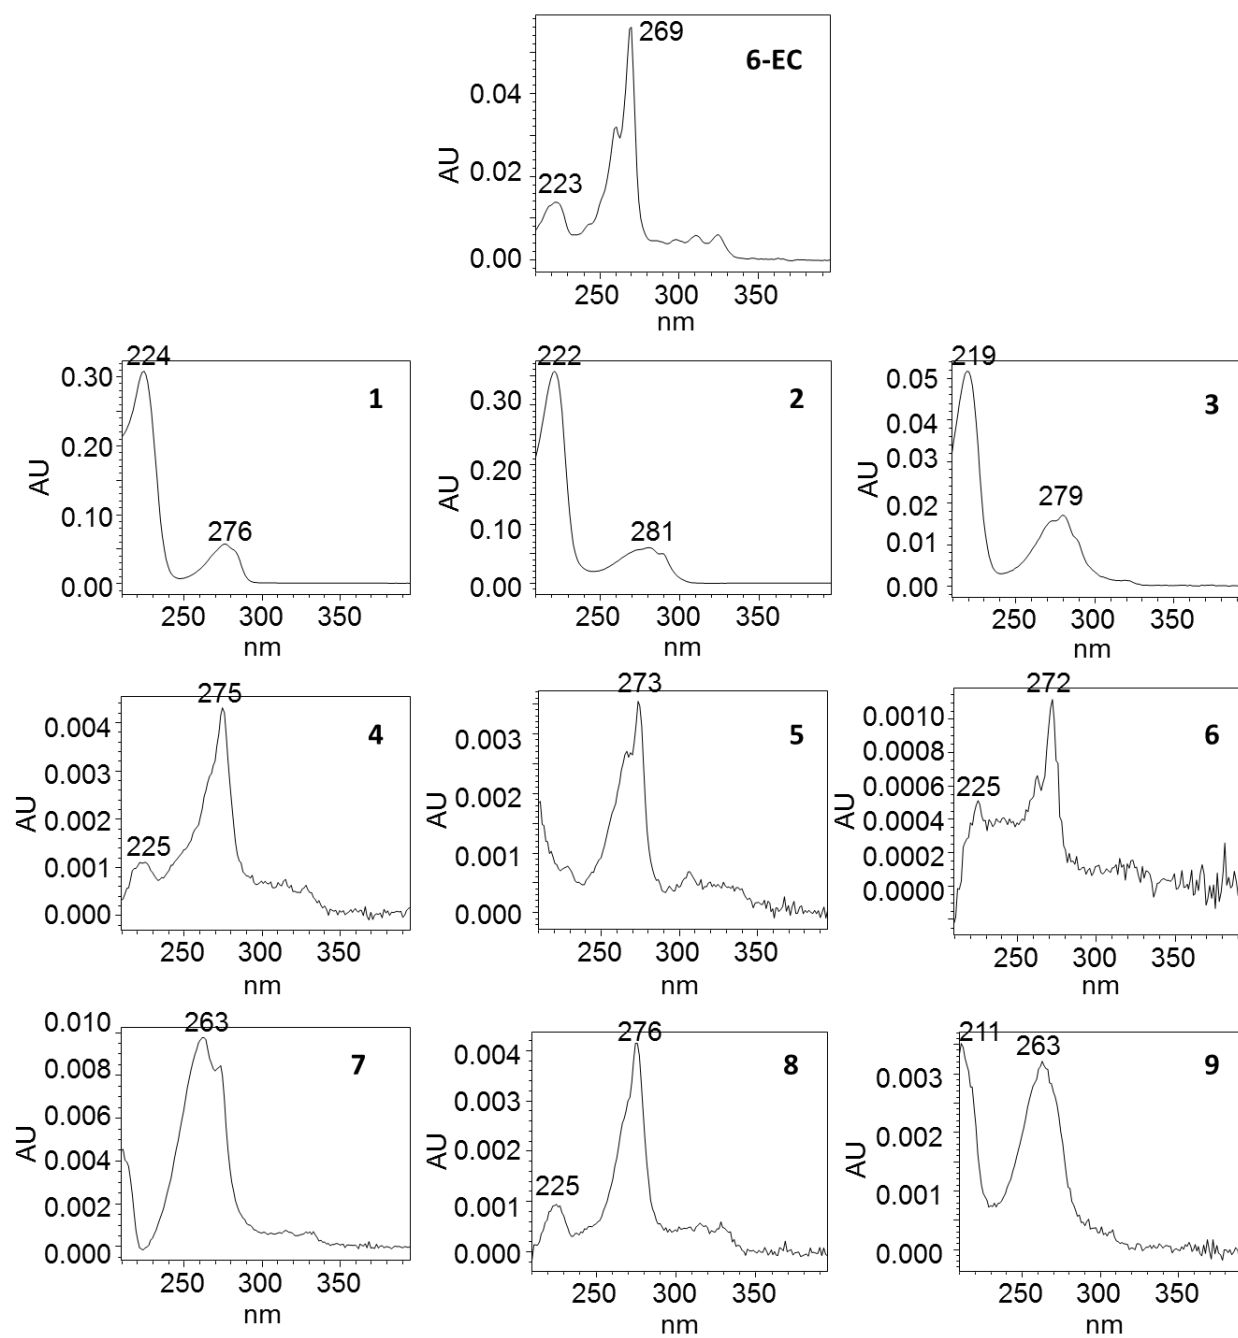

**Figure S2.** UV spectra of 6-EC and metabolite 1-9 in HepG2 cells.

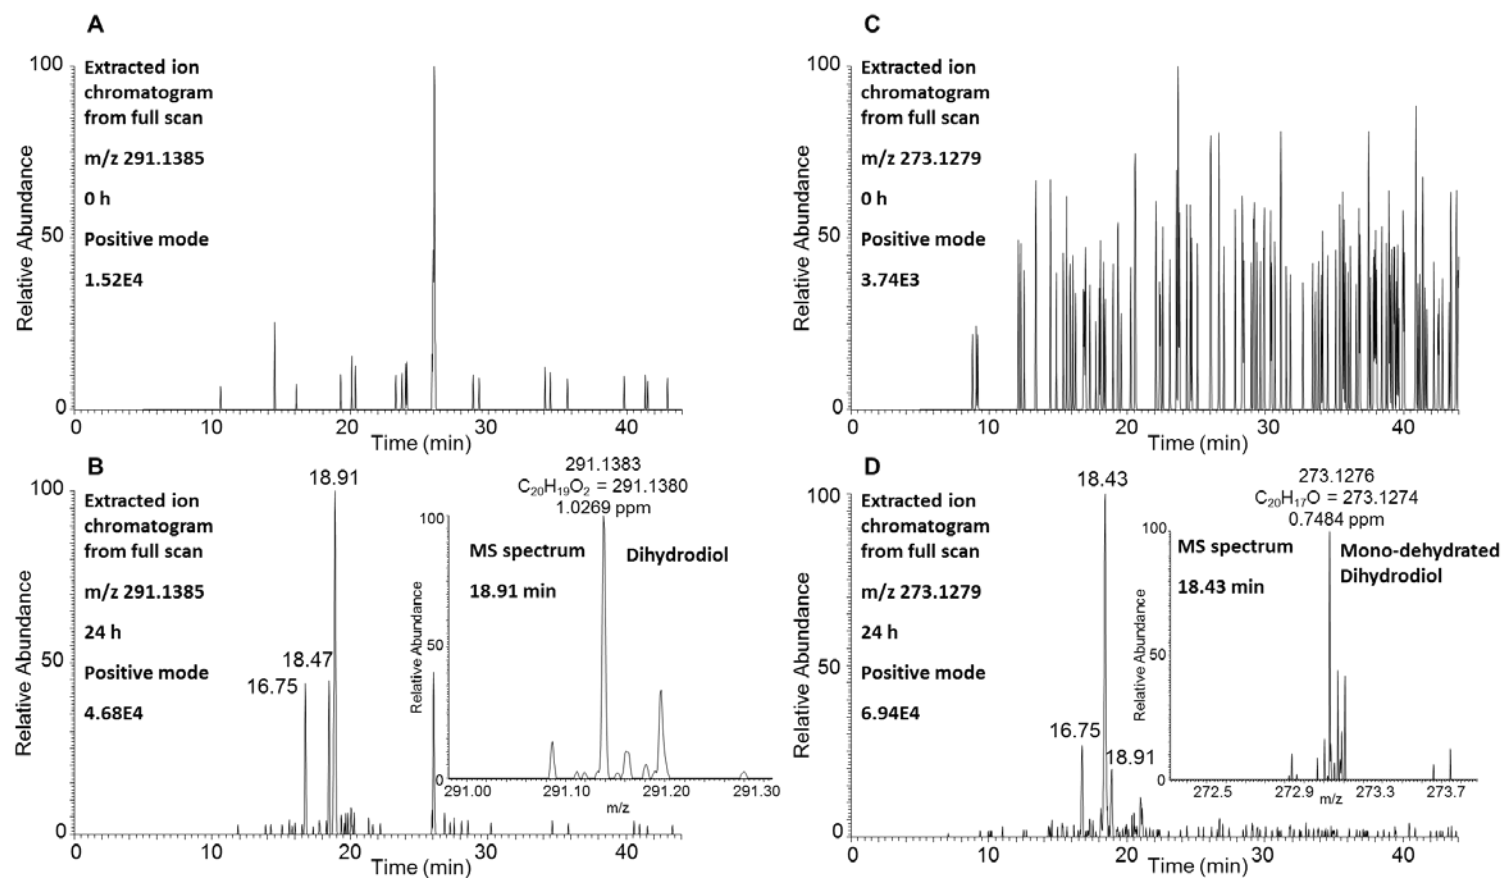

**Figure S3.** Detection of 6-EC-dihydrodiols and monodehydrated 6-EC-dihydrodiols in human HepG2 cells. (A) Extracted ion chromatogram of Orbitrap full scan for 6-EC-dihydrodiols at 0 h. (B) Extracted ion chromatogram of Orbitrap full scan for 6-EC-dihydrodiols at 24 h and MS spectrum of the peak at 18.91 min. (C) Extracted ion chromatogram of Orbitrap full scan for monodehydrated 6-EC-dihydrodiols at 0 h. (D) Extracted ion chromatogram of Orbitrap full scan for monodehydrated 6-EC-dihydrodiols at 24 h and MS spectrum of the peak at 18.43 min.

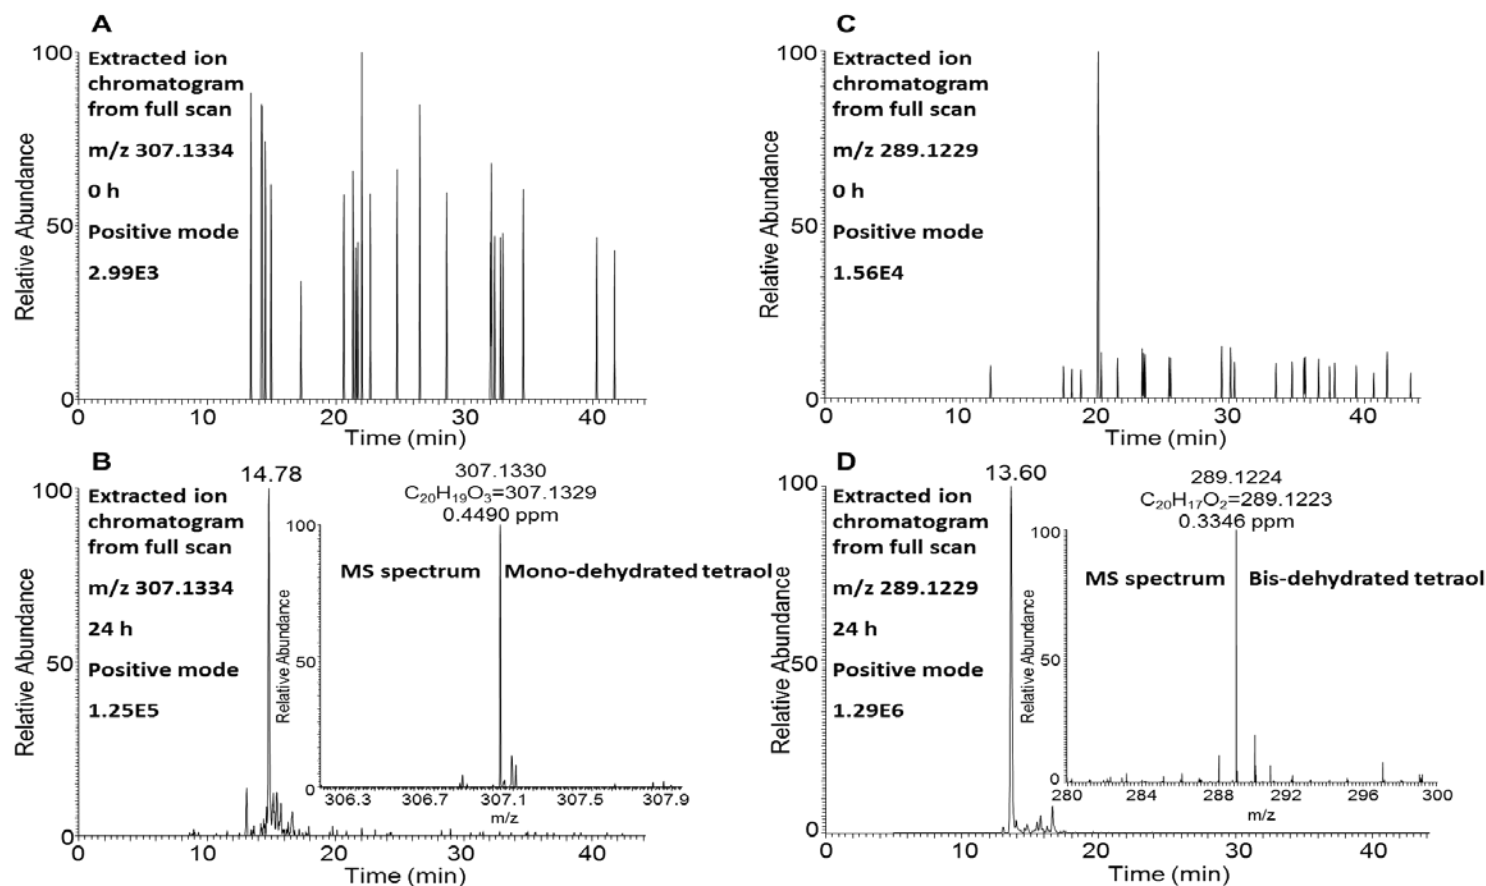

**Figure S4.** Detection of monodehydrated 6-EC-tetraol and bis-dehydrated 6-EC-tetraol in human HepG2 cells. (A) Extracted ion chromatogram of Orbitrap full scan for monodehydrated 6-EC-tetraol at 0 h. (B) Extracted ion chromatogram of Orbitrap full scan for monodehydrated 6-EC-tetraol at 24 h and MS spectrum of the peak at 14.78 min. (C) Extracted ion chromatogram of Orbitrap full scan for bis-dehydrated 6-EC-tetraol at 0 h. (D) Extracted ion chromatogram of Orbitrap full scan for bis-dehydrated 6-EC-tetraol at 24 h and MS spectrum of the peak at 13.60 min.

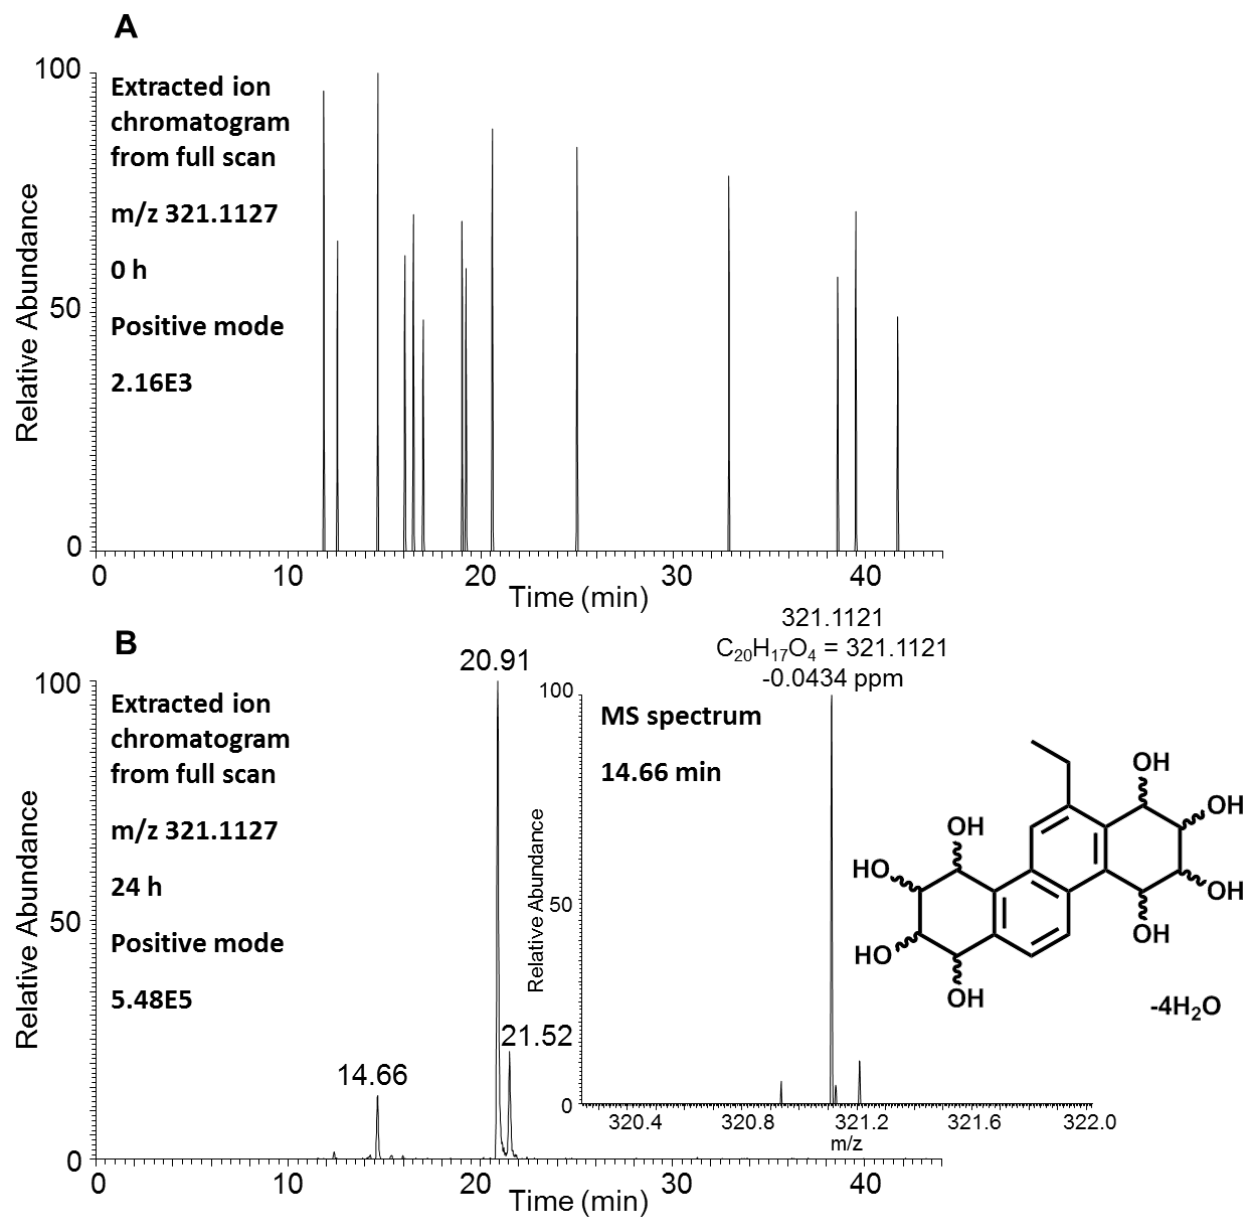

**Figure S5.** Detection of bis-tetraol in human HepG2 cells. (A) Extracted ion chromatogram of Orbitrap full scan at 0 h. (B) Extracted ion chromatogram of Orbitrap full scan at 24 h and MS spectrum of the peak at 14.66 min.



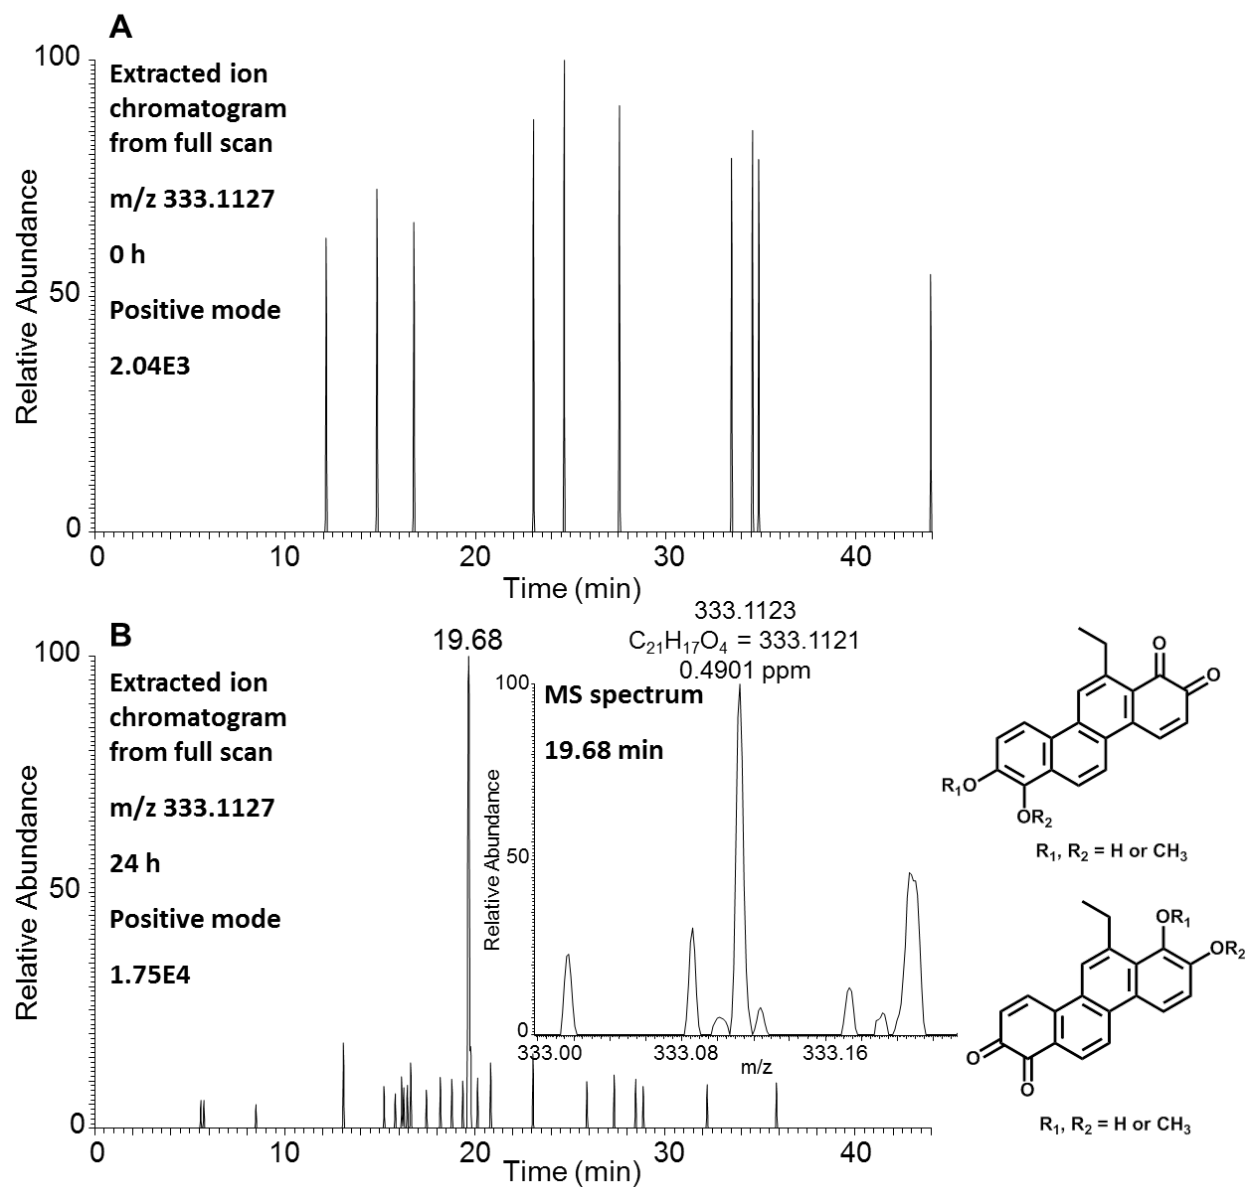

**Figure S6.** Detection of O-monomethyl-catechol-6-EC-ortho-quinone in human HepG2 cells. (A) Extracted ion chromatogram of Orbitrap full scan at 0 h. (B) Extracted ion chromatogram of Orbitrap full scan at 24 h and MS spectrum of the peak at 19.68 min.

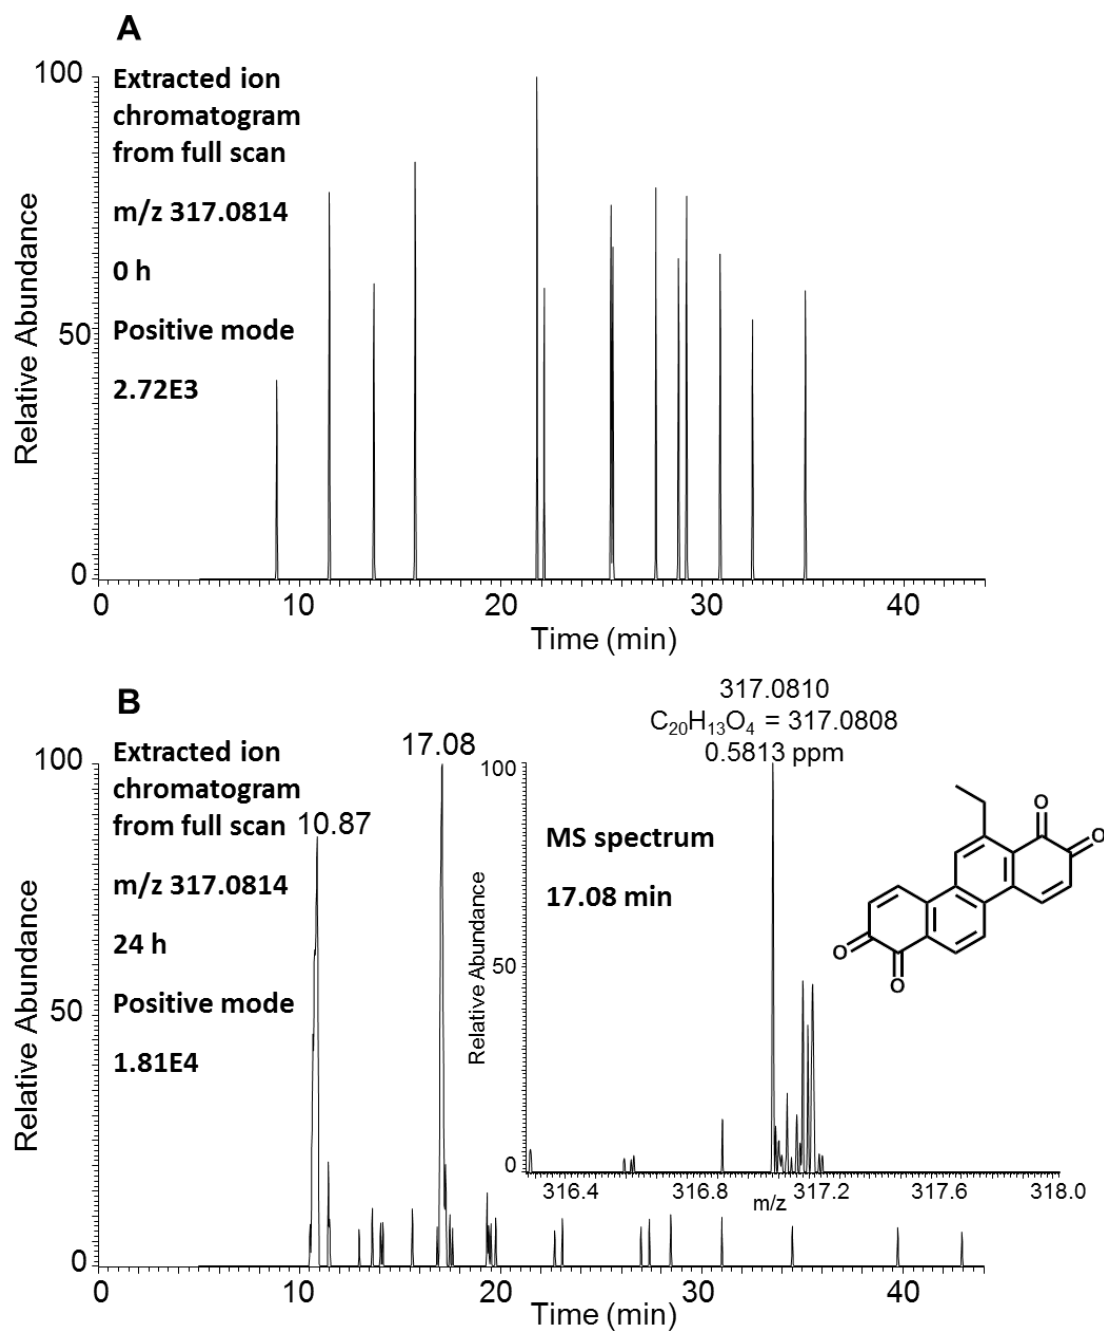

**Figure S7.** Detection of 6-EC-bis-ortho-quinone in human HepG2 cells. (A) Extracted ion chromatogram of Orbitrap full scan at 0 h. (B) Extracted ion chromatogram of Orbitrap full scan at 24 h and MS spectrum of the peak at 17.08 min.
